# Supplementary material
Source: PubMed Central journal article supplement (PMC3386082)
Supplement: 1207091109_pnas.201207091SI.pdf [file 1207091109_pnas.201207091SI.pdf]

# Supporting Information

Le Gac et al. 10.1073/pnas.1207091109

**Table S1. Cluster analysis of genes differentially expressed between the L and S lineages within and across generations**

|                    |                          | Cluster (no. of genes)                                                |                                                        |                                                |                                    |                                                        |                           |
|--------------------|--------------------------|-----------------------------------------------------------------------|--------------------------------------------------------|------------------------------------------------|------------------------------------|--------------------------------------------------------|---------------------------|
|                    |                          | e1 (367)                                                              | e2 (133)                                               | e3 (96)                                        | e4 (80)                            | e5 (57)                                                | e6 (27)                   |
| Cellular functions | Carbohydrate catabolism  |                                                                       | Iron transport                                         | Glyoxylate cycle                               | Glycerol metabolism                | Enterobactin biosynthesis                              | Glutamate biosynthesis    |
|                    | Flagella biogenesis      |                                                                       | Enterobactin biosynthesis                              | Nitrogen metabolism                            | Sulfur metabolism                  | Nonribosomal peptide biosynthesis                      | Aspartate biosynthesis    |
|                    | Amino sugar biosynthesis |                                                                       | RNA modification                                       | Entner–Doudoroff pathway                       |                                    | Iron transport                                         | Polysaccharide catabolism |
|                    | Taxis                    |                                                                       | Nucleobase, nucleoside, and nucleotide interconversion | Glutamate biosynthesis                         |                                    | Nucleobase, nucleoside, and nucleotide interconversion |                           |
|                    | Fatty acid oxidation     |                                                                       | Purine biosynthesis                                    |                                                |                                    |                                                        |                           |
|                    | Peptidoglycan metabolism |                                                                       | Response to temperature                                |                                                |                                    |                                                        |                           |
|                    | Amino acid catabolism    |                                                                       |                                                        |                                                |                                    |                                                        |                           |
|                    | Glycerol metabolism      |                                                                       |                                                        |                                                |                                    |                                                        |                           |
|                    | Methylglyoxal metabolism |                                                                       |                                                        |                                                |                                    |                                                        |                           |
|                    | Regulators               | <i>crp, csfR, cusR, fadR, flhC, flhD, fucR, gutM, lrp, rpiR, srlR</i> | <i>fur, nadR, purR</i>                                 | <i>fruR, glnG, gntR, iclR, nac, phoP, rpoN</i> | <i>cysB, mlc, glpR, nagC, nanR</i> | <i>fur</i>                                             | <i>malT</i>               |

Columns show cellular functions and regulators that are overrepresented in the six gene expression clusters e1–e6. The number of genes in each cluster is shown after the cluster label. In addition, 37 genes showed variable expression between evolved samples but did not cluster. Many other genes showed no significant differences between samples or significant differences only between the ancestral and evolved samples, and those genes were not included in the cluster analysis. Cellular functions correspond to the Gene Ontology cellular process categories (1); regulators were identified using RegulonDB (2).

1. Riley M, et al. (2006) *Escherichia coli* K-12: A cooperatively developed annotation snapshot—2005. *Nucleic Acids Res* 34:1–9.

2. Gama-Castro S, et al. (2008) RegulonDB (version 6.0): Gene regulation model of *Escherichia coli* K-12 beyond transcription, active (experimental) annotated promoters and Textpresso navigation. *Nucleic Acids Res* 36(Database issue):D120–D124.

**Table S2. Cluster analysis of differential growth abilities across environmental conditions between the L and S lineages within and across generations**

| Cluster (no. of conditions)  |                        |                             |                                           |                                   |
|------------------------------|------------------------|-----------------------------|-------------------------------------------|-----------------------------------|
| g1 (18)                      | g2 (9)                 | g3 (9)                      | Not clustered (12) or nonsignificant (3)* | No growth (43)                    |
| 1% NaCl                      | Acetic acid            | $\alpha$ -D-glucose         | 4% (vol/vol) NaCl                         | 3-Methyl glucose                  |
| 1% sodium lactate            | $\alpha$ -D-lactose    | D-gluconic acid             | Aztreonam                                 | 8% (vol/vol) NaCl                 |
| D-fructose                   | D-galacturonic acid    | D-glucose-6-PO <sub>4</sub> | Dextrin                                   | Acetoacetic acid                  |
| D-fructose-6-PO <sub>4</sub> | D-glucuronic acid      | D-sorbitol                  | D-maltose                                 | $\alpha$ -Hydroxy-butyric acid    |
| D-galactose                  | D-threhalose           | L-lactic acid               | D-saccharic acid                          | $\alpha$ -Keto-butyric acid       |
| D-mannitol                   | Glycerol               | Methyl pyruvate             | D-serine                                  | $\alpha$ -Keto-glutaric acid      |
| D-mannose                    | L-alanine              | N-acetyl-neuraminic acid    | Glucuronamide                             | $\beta$ -Hydroxy-D,L-butyric acid |
| D-melibiose                  | Mucic acid             | P-hydroxy-phenylacetic acid | Guanidine HCl                             | $\beta$ -methyl-D-glucoside       |
| Fusidic acid                 | N-acetyl-D-glucosamine | Sodium butyrate             | L-aspartic acid                           | Bromo-succinic acid               |
| Glycyl-L-proline             |                        |                             | L-glutamic acid                           | Citric acid                       |
| Inosine                      |                        |                             | L-malic acid                              | D-arabitol                        |
| L-serine                     |                        |                             | L-rhamnose                                | D-aspartic-acid                   |
| pH 5                         |                        |                             | N-acetyl- $\beta$ -D-mannosamine          | D-cellobiose                      |
| pH 6                         |                        |                             | N-acetyl-D-galactosamine                  | D-fucose                          |
| Rifamycin SV                 |                        |                             | Niaproof4                                 | D-lactic acid methyl ester        |
| Tetrazolium violet           |                        |                             |                                           | D-malic acid                      |
| Troleandomycin               |                        |                             |                                           | D-raffinose                       |
| Vancomycin                   |                        |                             |                                           | D-salicilin                       |
|                              |                        |                             |                                           | D-serine                          |
|                              |                        |                             |                                           | D-turanose                        |
|                              |                        |                             |                                           | Formic acid                       |
|                              |                        |                             |                                           | $\gamma$ -amino-butyric acid      |
|                              |                        |                             |                                           | Gelatin                           |
|                              |                        |                             |                                           | Gentobiose                        |
|                              |                        |                             |                                           | L-arginine                        |
|                              |                        |                             |                                           | L-fucose                          |
|                              |                        |                             |                                           | L-galactonic acid                 |
|                              |                        |                             |                                           | Lactone                           |
|                              |                        |                             |                                           | L-histidine                       |
|                              |                        |                             |                                           | Lincomycin                        |
|                              |                        |                             |                                           | Lithium chloride                  |
|                              |                        |                             |                                           | L-pyroglutamic acid               |
|                              |                        |                             |                                           | Minocycline                       |
|                              |                        |                             |                                           | Nalidixic acid                    |
|                              |                        |                             |                                           | Pectin                            |
|                              |                        |                             |                                           | Potassium tellurite               |
|                              |                        |                             |                                           | Propionic acid                    |
|                              |                        |                             |                                           | Quinic acid                       |
|                              |                        |                             |                                           | Sodium bromate                    |
|                              |                        |                             |                                           | Stachyose                         |
|                              |                        |                             |                                           | Sucrose                           |
|                              |                        |                             |                                           | Tetrazolium blue                  |
|                              |                        |                             |                                           | Tween 40                          |

\*The three nonsignificant environments were aztreonam, D-mannitol, and glucuronamide. Aztreonam showed a difference only between the ancestral and evolved bacteria and thus was excluded from this analysis, which focused on differences between the L and S lineages within and across generations.
